# Supplementary material
Source: PubMed Central journal article supplement (PMC5669386)

Figure S1. QMR fat mass (kg) as a function of body weight in newborns

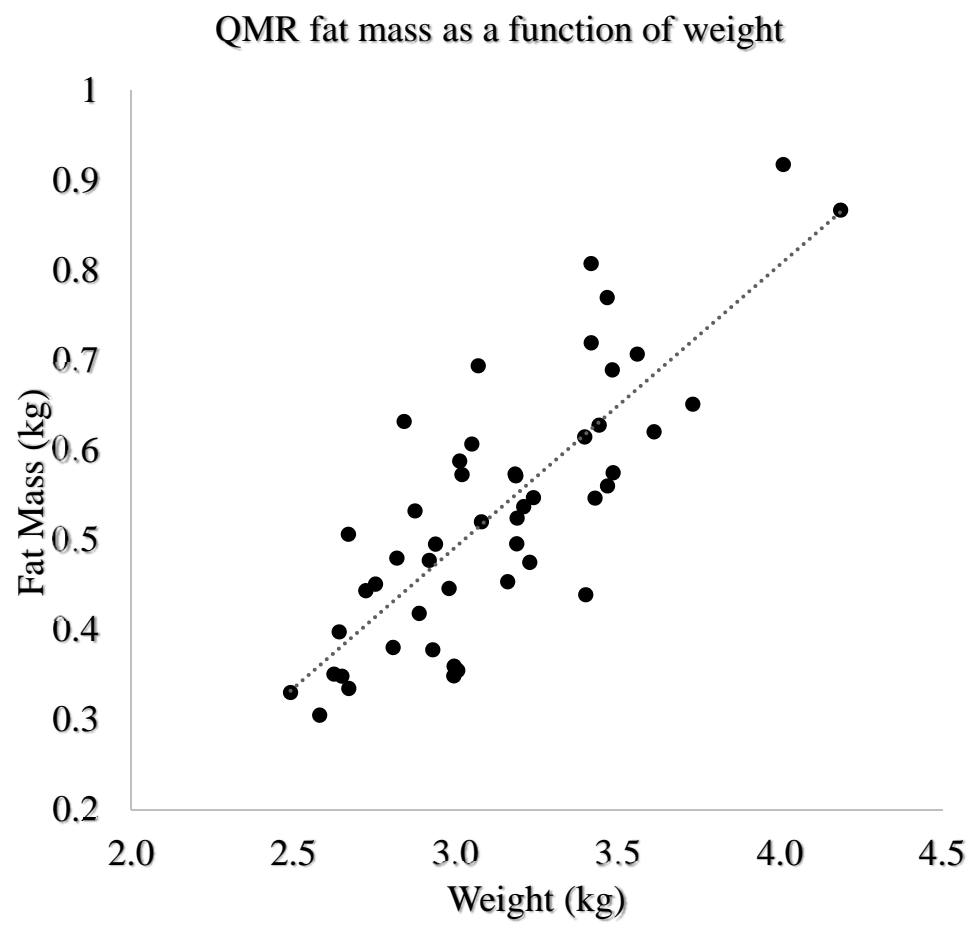

**Figure S2.** QMR fat mass (kg) versus PEA POD fat mass in newborns and Bland-Altman plot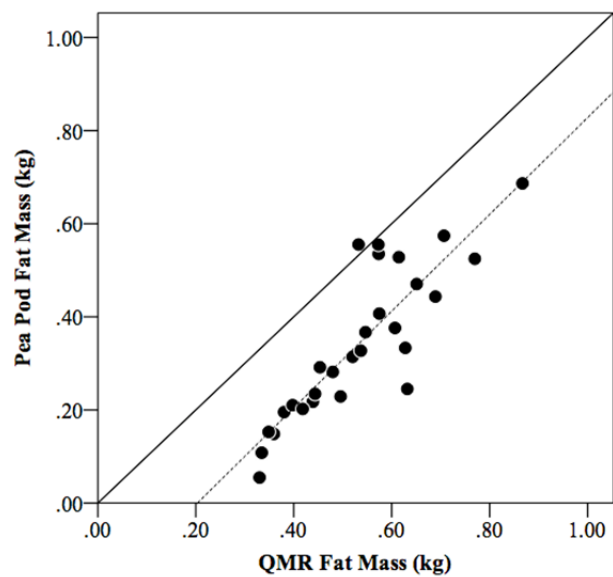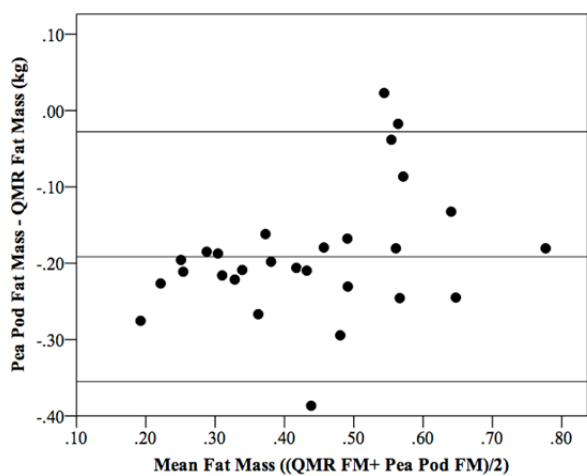

Figure S3. QMR fat free mass (kg) versus PEA POD fat free mass in newborns and Bland-Altman plot

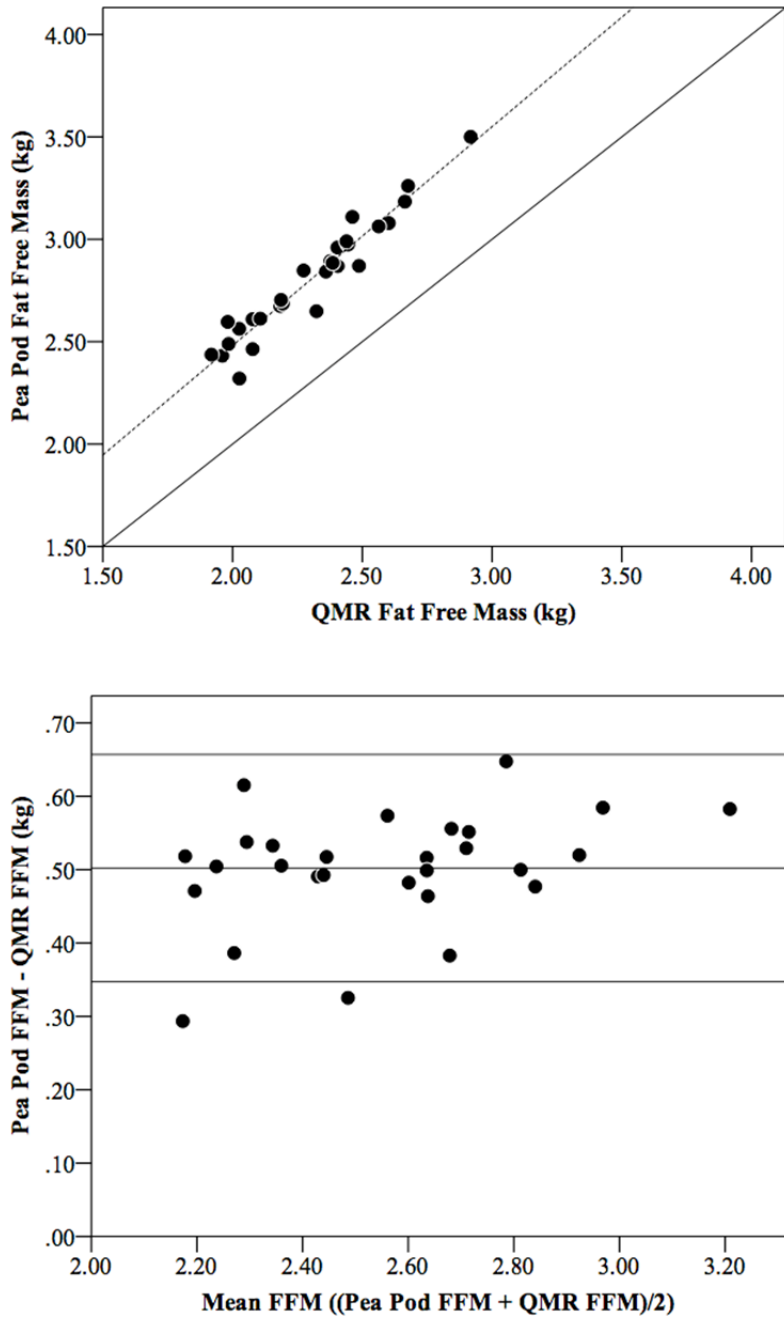

Supplement: NIHMS882849-supplement-supplement_1.pdf [file NIHMS882849-supplement-supplement_1.pdf]
